# Supplementary material for: Macrolide Treatment Failure due to Drug–Drug Interactions: Real-World Evidence to Evaluate a Pharmacological Hypothesis
Source: MDPI journal article supplement (doi:10.3390/pharmaceutics14040704), 2022-03-25
Supplement: s1 [file s1]

# Supplementary Materials: Macrolide Treatment Failure Due to Drug–Drug Interactions: Real-World Evidence to Evaluate a Pharmacological Hypothesis

Brian Cicali, Stephan Schmidt, Markus Zeitlinger and Joshua D. Brown

**Table S1.** Bacterial-specific CAP ICD-9-CM Codes.

| ICD-9-CM | Textual Definition                                                     |
|----------|------------------------------------------------------------------------|
| 481      | Pneumococcal pneumonia [ <i>Streptococcus pneumoniae</i> pneumonia]    |
| 482      | Other bacterial pneumonia                                              |
| 482.0    | Pneumonia due to <i>Klebsiella pneumoniae</i>                          |
| 482.1    | Pneumonia due to <i>Pseudomonas</i>                                    |
| 482.2    | Pneumonia due to <i>Hemophilus influenzae</i> [ <i>H. influenzae</i> ] |
| 482.3    | Pneumonia due to streptococcus                                         |
| 482.30   | Pneumonia due to <i>Streptococcus</i> , unspecified                    |
| 482.31   | Pneumonia due to <i>Streptococcus</i> , group A                        |
| 482.32   | Pneumonia due to <i>Streptococcus</i> , group B                        |
| 482.39   | Pneumonia due to other <i>Streptococcus</i>                            |
| 482.4    | Pneumonia due to staphylococcus                                        |
| 482.40   | Pneumonia due to <i>Staphylococcus</i> , unspecified                   |
| 482.41   | Methicillin susceptible pneumonia due to <i>Staphylococcus aureus</i>  |
| 482.42   | Methicillin resistant pneumonia due to <i>Staphylococcus aureus</i>    |
| 482.49   | Other <i>Staphylococcus</i> pneumonia                                  |
| 482.8    | Pneumonia due to other specified bacteria                              |
| 482.81   | Pneumonia due to anaerobes                                             |
| 482.82   | Pneumonia due to <i>escherichia coli</i> [ <i>E. coli</i> ]            |
| 482.83   | Pneumonia due to other gram-negative bacteria                          |
| 482.84   | Pneumonia due to Legionnaires' disease                                 |
| 482.89   | Pneumonia due to other specified bacteria                              |
| 482.9    | Bacterial pneumonia, unspecified                                       |
